# Supplementary material for: Do All Critically Ill Patients with COVID-19 Disease Benefit from Adding Tocilizumab to Glucocorticoids? A Retrospective Cohort Study
Source: Viruses. 2023 Jan 20;15(2):294. doi: 10.3390/v15020294 (PMC9967307; doi:10.3390/v15020294)
Supplement: Supplementary file 1 [file viruses-15-00294-s001.zip › viruses-2111985-supplementary.pdf]

**Supplementary Table S1. Therapies used by treatment group**

|                                                        | Treatment strategy |                               |          |              |
|--------------------------------------------------------|--------------------|-------------------------------|----------|--------------|
|                                                        | Glucocorticoids    | Glucocorticoids + tocilizumab | p-value* | Total        |
|                                                        | N= 597             | N= 395                        |          | N= 992       |
| <b>Heparin, n(%)</b>                                   |                    |                               |          |              |
| Prophylaxis                                            | 360 (60.3%)        | 223 (56.5%)                   |          | 583 (58.8%)  |
| Intermediate                                           | 173 (29.0%)        | 160 (40.5%)                   | <.001    | 333 (33.6%)  |
| Full dose                                              | 14 (2.3%)          | 15 (3.8%)                     | 0.184    | 29 (2.9%)    |
| <b>Remdesivir, n(%)</b>                                | 5 (0.8%)           | 12 (3.0%)                     | 0.009    | 17 (1.7%)    |
| <b>Glucocorticoids, n(%)</b>                           |                    |                               |          |              |
| Standard dose (Dexamethasone, 6 mg/day)                | 565 (94.6%)        | 337 (85.3%)                   | <.001    | 902 (90.9%)  |
| High dose (Methylprednisolone 2 mg/kg body weight/day) | 32 (5.4%)          | 58 (14.7%)                    | <.001    | 90 (9.1%)    |
| <b>Tocilizumab, n(%)</b>                               | 0 (0.0%)           | 395 (100.0%)                  | <.001    | 395 (39.8%)  |
| <b>Anakinra, n(%)</b>                                  | 0 (0.0%)           | 0 (0.0%)                      |          | 0 (0.0%)     |
| <b>Delay in starting intervention, days</b>            |                    |                               |          |              |
| Median (IQR)                                           | 0 (0.0, 2.0)       | 2 (1.0, 3.0)                  |          | 1 (0.0, 3.0) |
| <b>Started &lt;=2 days after admission, n(%)</b>       | 161 (27.0%)        | 210 (53.2%)                   | <.001    | 371 (37.4%)  |

\*Chi-square test

**Supplementary Table S2. Outcomes by treatment group**

| Outcomes                                                     | Treatment strategy |                               |          |                   |
|--------------------------------------------------------------|--------------------|-------------------------------|----------|-------------------|
|                                                              | Glucocorticoids    | Glucocorticoids + tocilizumab | p-value* | Total             |
|                                                              | N= 597             | N= 395                        |          | N= 992            |
| <b>HFNO, n(%)</b>                                            | 69 (11.6%)         | 202 (51.1%)                   | <.001    | 271 (27.3%)       |
| <b>NIV, n(%)</b>                                             | 38 (6.4%)          | 112 (28.4%)                   | <.001    | 150 (15.1%)       |
| <b>Invasive mechanical ventilation (IMV), n(%)</b>           | 34 (5.7%)          | 52 (13.2%)                    | <.001    | 86 (8.7%)         |
| <b>Days between hospital admission and NIV, Median (IQR)</b> | 1.0 (0.0, 7.0)     | 2.0 (1.0, 4.5)                | 0.187    | 2.0 (1.0, 5.0)    |
| <b>Days between disease onset and IMV, Median (IQR)</b>      | 7.0 (4.0, 15.0)    | 12.0 (8.0, 17.0)              | 0.028    | 11.0 (7.0, 16.0)  |
| <b>Days free from HFNO (days), Median (IQR)</b>              | 24.0 (20.0, 27.0)  | 24.0 (20.0, 26.0)             | 0.683    | 24.0 (20.0, 26.0) |
| <b>Days free from NIV (days), Median (IQR)</b>               | 26.0 (23.0, 27.0)  | 25.0 (23.0, 27.0)             | 0.459    | 25.0 (23.0, 27.0) |
| <b>Days free from IMV (days), Median (IQR)</b>               | 23.0 (17.5, 25.5)  | 21.0 (15.0, 24.0)             | 0.287    | 21.0 (16.0, 25.0) |
| <b>Days free from hospital (days), Median (IQR)</b>          | 20.0 (14.0, 23.0)  | 14.0 (3.0, 18.0)              | <.001    | 17.0 (10.0, 22.0) |
| <b>Days free from ICU (days), Median (IQR)</b>               | 23.0 (21.0, 26.0)  | 24.0 (20.0, 25.0)             | 0.551    | 24.0 (20.0, 26.0) |
| <b>Death, n(%)</b>                                           | 113 (18.9%)        | 79 (20.0%)                    | 0.676    | 192 (19.4%)       |
| <b>Death in those requiring HFNO, n(%)</b>                   | 19 (27.5%)         | 55 (27.2%)                    | 0.960    | 74 (27.3%)        |
| <b>Death in those requiring NIV, n(%)</b>                    | 13 (34.2%)         | 38 (33.9%)                    | 0.975    | 51 (34.0%)        |
| <b>Death in those requiring IMV, n(%)</b>                    | 17 (50.0%)         | 25 (48.1%)                    | 0.862    | 42 (48.8%)        |
| <b>Discharged before day 28, n(%)</b>                        | 440 (73.7%)        | 247 (62.5%)                   | <.001    | 687 (69.3%)       |
| <i>Discharged to home, n(%)</i>                              | 320 (72.7%)        | 190 (76.9%)                   | 0.228    | 510 (74.2%)       |
| <i>Discharged to RSA, n(%)</i>                               | 120 (27.3%)        | 57 (23.1%)                    |          | 177 (25.8%)       |
| <b>Main delays</b>                                           |                    |                               |          |                   |
| Days from symptoms onset to hospitalisation, median(IQR)     | 6 (3, 9)           | 6 (3, 8)                      | 0.401    | 6 (3, 9)          |
| Days from symptoms onset to ICU, median(IQR)                 | 7 (5, 11)          | 9 (7, 12)                     | 0.028    | 8 (6, 12)         |
| Days from hospitalisation to ICU, median(IQR)                | 0 (0, 2)           | 3 (1, 6)                      | <.001    | 1 (0, 4)          |
| Hospitalised in 2021, n(%)                                   | 166 (27.8%)        | 103 (26.1%)                   | 0.549    | 269 (27.1%)       |

\*Chi-square or Mann-Whitney test

**Supplementary Table S3. Unadjusted and adjusted HR of death from fitting Cox regression models - after removing those starting high level glucocorticoids**

|                                                         | Hazard ratios of death (95% CI) | p-value |
|---------------------------------------------------------|---------------------------------|---------|
| <b>Unadjusted</b>                                       |                                 |         |
| Glucocorticoids                                         | 1                               |         |
| Glucocorticoids + tocilizumab                           | 0.67 (0.46, 0.99)               | 0.042   |
| <b>Adjusted for time-fixed covariates<sup>1</sup></b>   |                                 |         |
| Glucocorticoids                                         | 1                               |         |
| Glucocorticoids + tocilizumab                           | 0.56 (0.35, 0.90)               | 0.016   |
| <b>Adjusted for time-varying covariates<sup>2</sup></b> |                                 |         |
| Glucocorticoids                                         | 1                               |         |
| Glucocorticoids + tocilizumab                           | 0.66 (0.41, 1.07)               | 0.090   |
| <b>Weighted<sup>3</sup></b>                             |                                 |         |
| Glucocorticoids                                         | 1                               |         |
| Glucocorticoids + tocilizumab                           | 0.59 (0.38, 0.93)               | 0.022   |

<sup>1</sup>standard Cox model adjusted for age, ethnicity, CCI, baseline CRP and PaO<sub>2</sub>-FiO<sub>2</sub> ratio

<sup>2</sup>standard Cox model adjusted for age, ethnicity, CCI, baseline PaO<sub>2</sub>-FiO<sub>2</sub> ratio and CRP and time-varying use of remdesivir, invasive mechanical ventilation, PaO<sub>2</sub>-FiO<sub>2</sub> ratio and CRP

<sup>3</sup>weighted Cox model controlled for age, ethnicity, CCI, baseline PaO<sub>2</sub>-FiO<sub>2</sub> ratio and CRP and time-varying use of remdesivir, invasive mechanical ventilation, PaO<sub>2</sub>-FiO<sub>2</sub> ratio and CRP using IPW

**Supplementary Table S4. Unadjusted and adjusted HR of death from fitting Cox regression models - after removing those aged 75+ or with solid cancer**

|                                                         | Hazard ratios of death (95% CI) | p-value |
|---------------------------------------------------------|---------------------------------|---------|
| <b>Unadjusted</b>                                       |                                 |         |
| Glucocorticoids                                         | 1                               |         |
| Glucocorticoids + tocilizumab                           | 0.74 (0.48, 1.14)               | 0.169   |
| <b>Adjusted for time-fixed covariates<sup>1</sup></b>   |                                 |         |
| Glucocorticoids                                         | 1                               |         |
| Glucocorticoids + tocilizumab                           | 0.60 (0.35, 1.01)               | 0.057   |
| <b>Adjusted for time-varying covariates<sup>2</sup></b> |                                 |         |
| Glucocorticoids                                         | 1                               |         |
| Glucocorticoids + tocilizumab                           | 0.77 (0.45, 1.32)               | 0.341   |
| <b>Weighted<sup>3</sup></b>                             |                                 |         |
| Glucocorticoids                                         | 1                               |         |
| Glucocorticoids + tocilizumab                           | 0.64 (0.38, 1.07)               | 0.087   |

<sup>1</sup>standard Cox model adjusted for age, ethnicity, CCI, baseline CRP and PaO<sub>2</sub>-FiO<sub>2</sub> ratio

<sup>2</sup>standard Cox model adjusted for age, ethnicity, CCI, baseline PaO<sub>2</sub>-FiO<sub>2</sub> ratio and CRP and time-varying use of remdesivir, invasive mechanical ventilation, PaO<sub>2</sub>-FiO<sub>2</sub> ratio and CRP

<sup>3</sup>weighted Cox model controlled for age, ethnicity, CCI, baseline PaO<sub>2</sub>-FiO<sub>2</sub> ratio and CRP and time-varying use of remdesivir, invasive mechanical ventilation, PaO<sub>2</sub>-FiO<sub>2</sub> ratio and CRP using IPW

**Supplementary Table S5. Results from fitting the Cox regression model after restricting to participants who had not received a full vaccination cycle prior to hospital admission.**

|                                                         | Hazard ratios of death (95% CI) | p-value |
|---------------------------------------------------------|---------------------------------|---------|
| <b>Unadjusted</b>                                       |                                 |         |
| Glucocorticoids                                         | 1                               |         |
| Glucocorticoids + tocilizumab                           | 0.84 (0.59, 1.22)               | 0.362   |
| <b>Adjusted for time-fixed covariates<sup>1</sup></b>   |                                 |         |
| Glucocorticoids                                         | 1                               |         |
| Glucocorticoids + tocilizumab                           | 0.59 (0.37, 0.93)               | 0.024   |
| <b>Adjusted for time-varying covariates<sup>2</sup></b> |                                 |         |
| Glucocorticoids                                         | 1                               |         |
| Glucocorticoids + tocilizumab                           | 0.61 (0.37, 0.98)               | 0.042   |
| <b>Weighted<sup>3</sup></b>                             |                                 |         |
| Glucocorticoids                                         | 1                               |         |
| Glucocorticoids + tocilizumab                           | 0.64 (0.42, 0.98)               | 0.038   |

<sup>1</sup>standard Cox model adjusted for age, ethnicity, CCI, baseline PaO<sub>2</sub>-FiO<sub>2</sub> ratio and CRP

<sup>2</sup>standard Cox model adjusted for age, ethnicity, CCI, baseline PaO<sub>2</sub>-FiO<sub>2</sub> ratio and CRP and time-varying use of remdesivir, invasive mechanical ventilation, PaO<sub>2</sub>-FiO<sub>2</sub> ratio and CRP

<sup>3</sup>weighted Cox model controlled for age, ethnicity, CCI, baseline PaO<sub>2</sub>-FiO<sub>2</sub> ratio and CRP and time-varying use of remdesivir, invasive mechanical ventilation, PaO<sub>2</sub>-FiO<sub>2</sub> ratio and CRP using IPW

**Supplementary Table S6. Causes of deaths by treatment strategy**

| Causes of death, n(%)                     | Treatment strategy |                               |          |
|-------------------------------------------|--------------------|-------------------------------|----------|
|                                           | Glucocorticoids    | Glucocorticoids + tocilizumab | p-value* |
| <b><i>MI or other cardiovascular</i></b>  | 8 (7.1%)           | 7 (8.9%)                      |          |
| <b><i>Cardiac decompensation</i></b>      | 16 (14.2%)         | 14 (17.7%)                    |          |
| <b><i>Infection</i></b>                   | 33 (29.2%)         | 23 (29.1%)                    |          |
| <b><i>Respiratory insufficiency</i></b>   | 25 (22.1%)         | 30 (38.0%)                    |          |
| <b><i>Other concomitant morbidity</i></b> | 29 (25.7%)         | 5 (6.3%)                      |          |
| <b><i>Unknown</i></b>                     | 2 (1.8%)           | 0 (0.0%)                      |          |
| <b><i>Total</i></b>                       | 79 (100.0%)        | 113 (100.0%)                  |          |

\*Chi-square

**Supplementary Table S7. Incidence of adverse events by treatment group**

| <b>Adverse event</b> | <b>Glucocorticoids</b> | <b>Glucocorticoids + tocilizumab</b> | <b>p-value</b>         | <b>Total</b>   |
|----------------------|------------------------|--------------------------------------|------------------------|----------------|
| Pulmonary Embolism   | 22/589 (3.7%)          | 24/391 (6.1%)                        | 0.08 <sup>&amp;</sup>  | 46/980 (4.7%)  |
| Sepsis               | 47/554 (8.5%)          | 34/81 (8.8%)                         | 0.87 <sup>&amp;</sup>  | 81/941 (8.7%)  |
| Neutropenia          | 10/432 (2.3%)          | 17/295 (5.8%)                        | 0.02 <sup>&amp;</sup>  | 27/727 (3.7%)  |
| Severe liver disease | 44/429 (10.3%)         | 53/295 (18.0%)                       | 0.003 <sup>&amp;</sup> | 97/724 (13.4%) |
| Thrombosis           | 2/589 (0.3%)           | 5/391 (1.3%)                         | 0.12 <sup>*</sup>      | 7/980 (0.7%)   |

<sup>&</sup>Chi-square test

<sup>\*</sup>Fisher exact test
